# Supplementary material for: miR-29 targets Akt3 to reduce proliferation and facilitate differentiation of myoblasts in skeletal muscle development
Source: PubMed Central journal article supplement — Cell Death Dis. 2013 Jun 13;4(6):e668–. doi: 10.1038/cddis.2013.184 (PMC3698551; doi:10.1038/cddis.2013.184), 2013-06-13
Supplement: cddis2013184x1.pdf [file cddis2013184x1.pdf]

## pooled miR-29

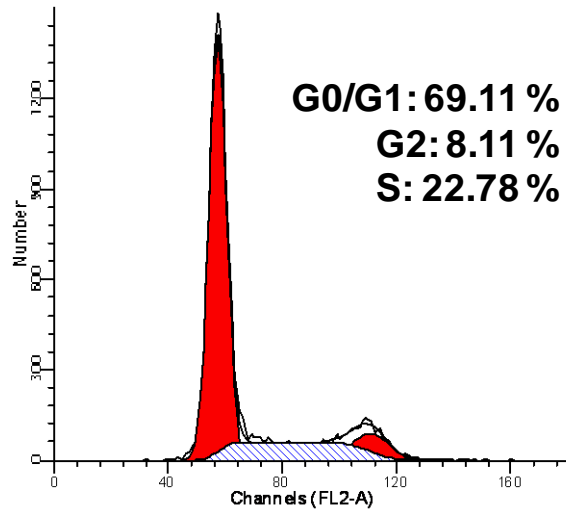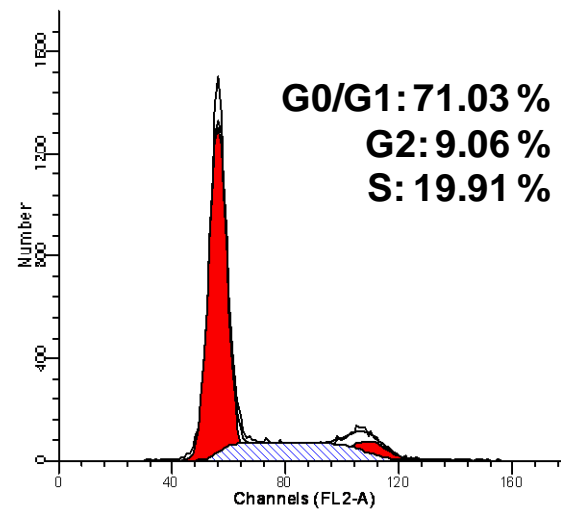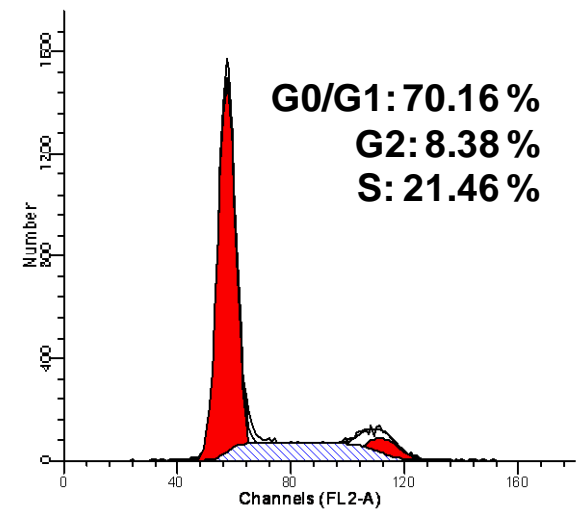

## scrambled

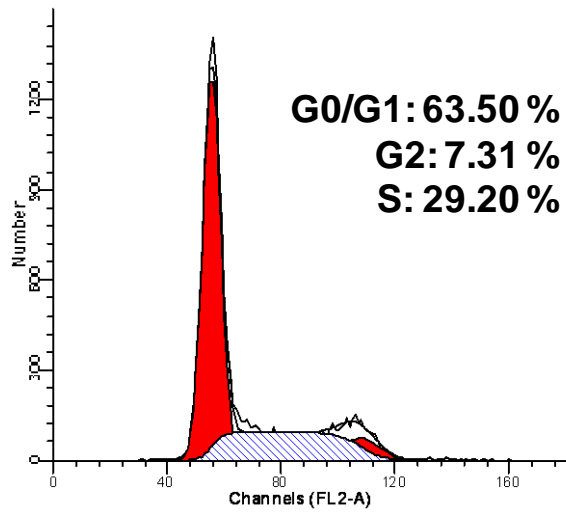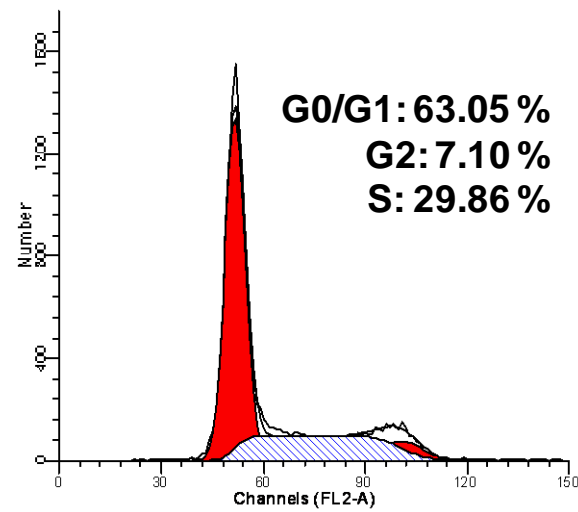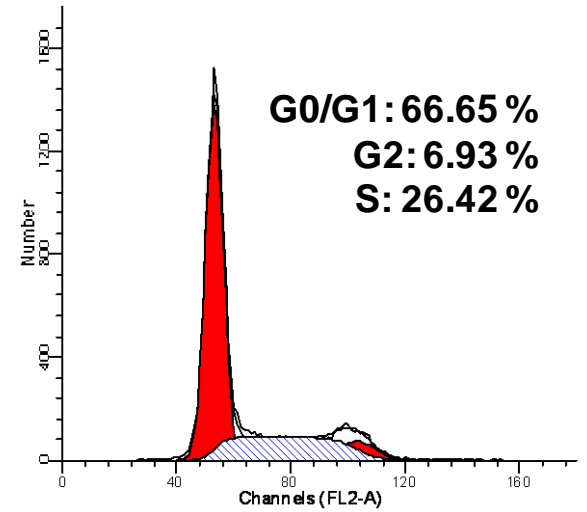

Supplementary Figure.1 The histograms of cell cycle analyzed by flow cytometry

## siAkt3

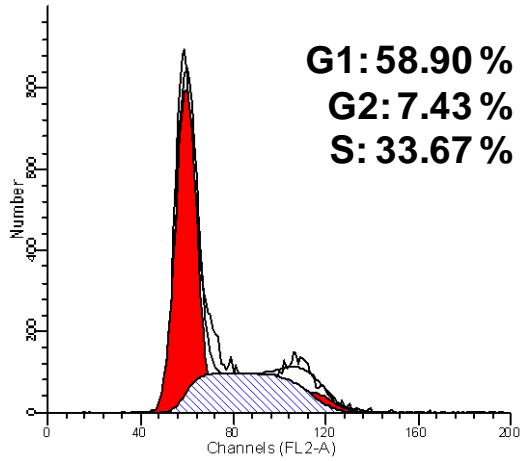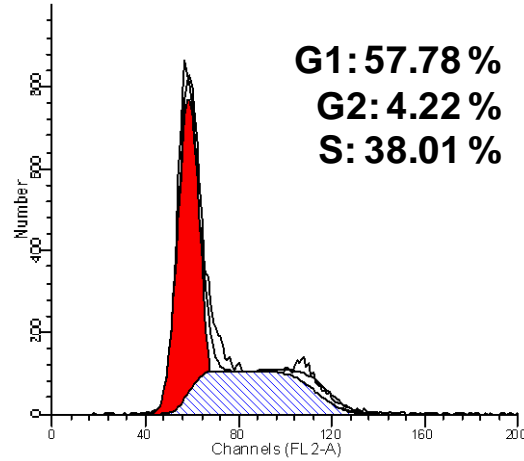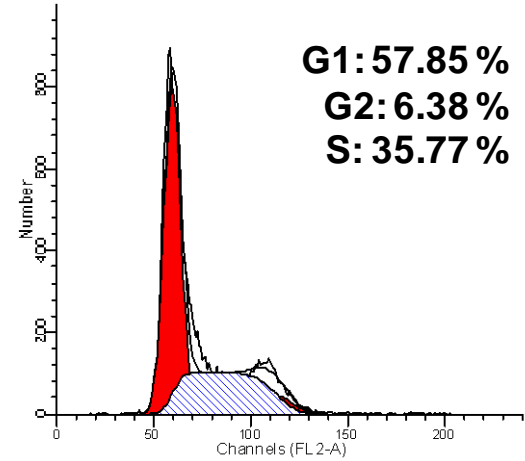

## NC

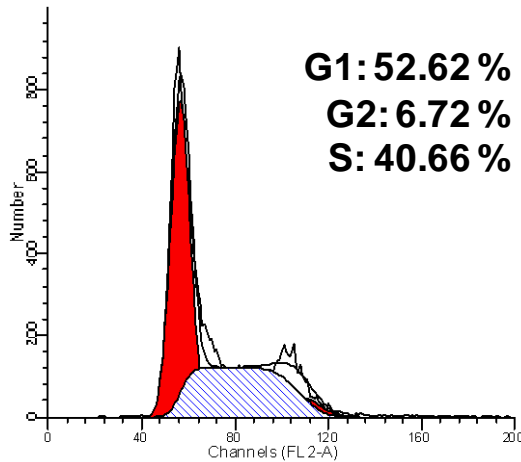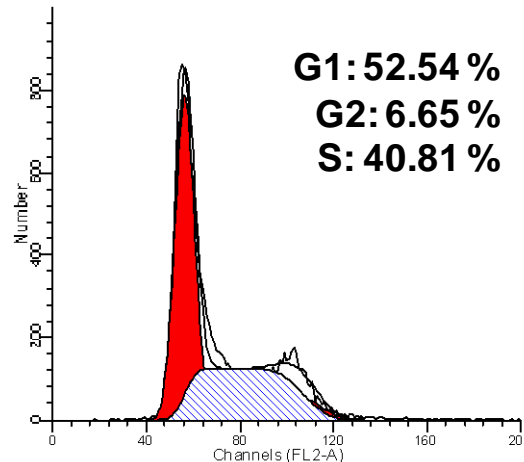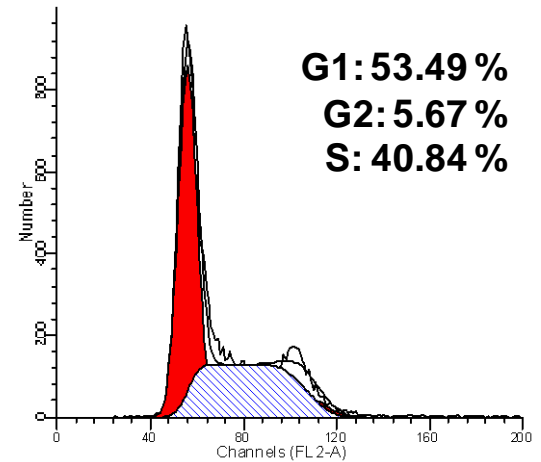

**Supplementary Figure.2 The histograms of cell cycle analyzed by flow cytometry**

## miR-29&AKT3-3.1

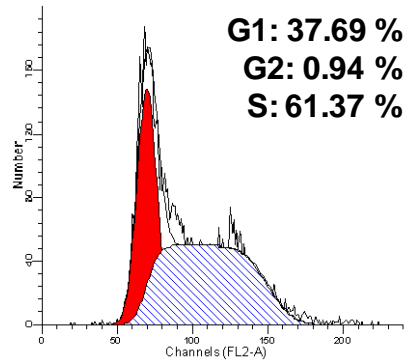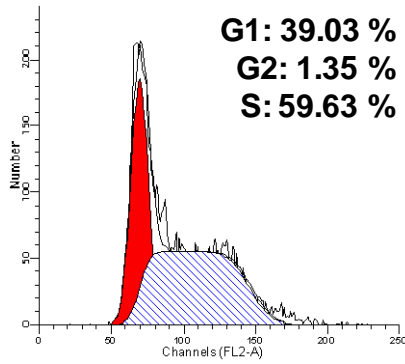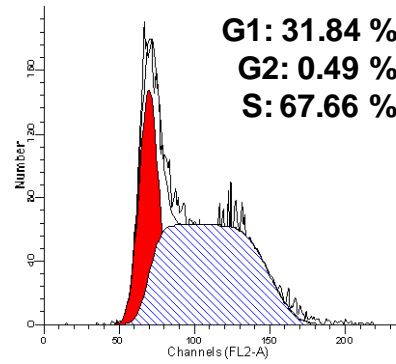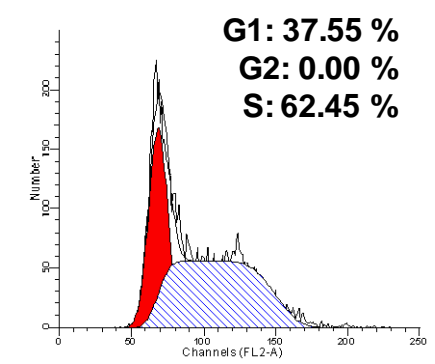

## miR-29&pCDNA-3.1

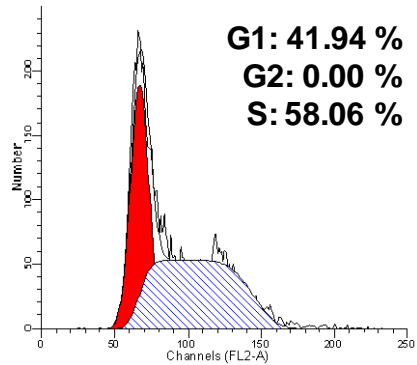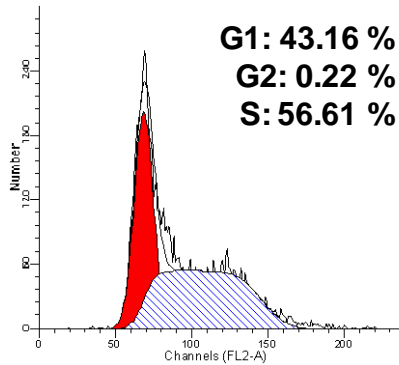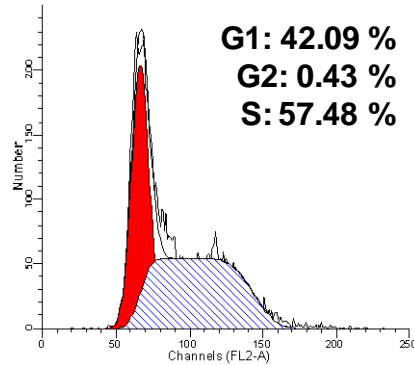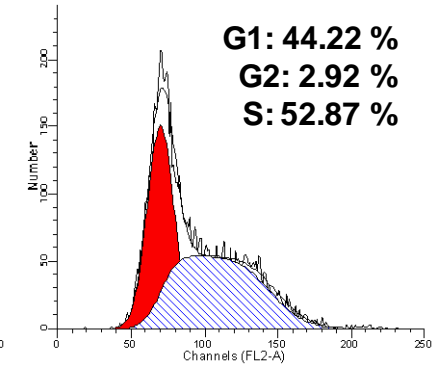

## NC&pCDNA-3.1

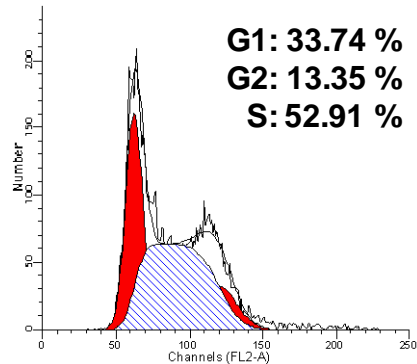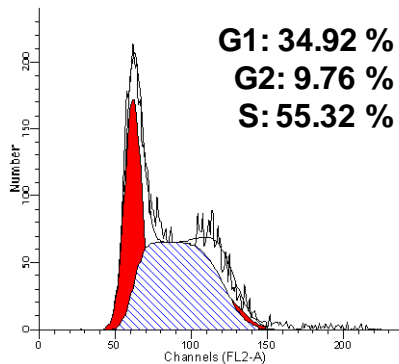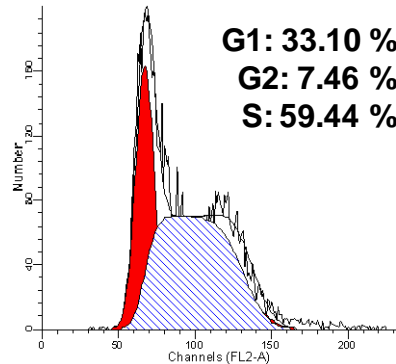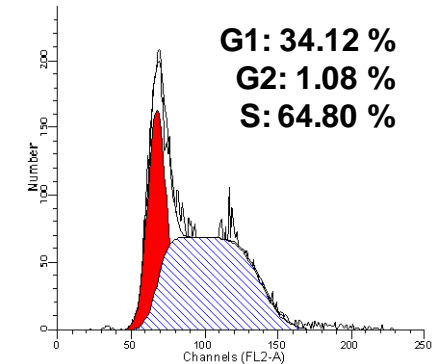

Supplementary Figure.3 The histograms of cell cycle analyzed by flow cytometry
