# Supplementary material for: miR-29 targets Akt3 to reduce proliferation and facilitate differentiation of myoblasts in skeletal muscle development
Source: PubMed Central journal article supplement — Cell Death Dis. 2013 Jun 13;4(6):e668–. doi: 10.1038/cddis.2013.184 (PMC3698551; doi:10.1038/cddis.2013.184), 2013-06-13
Supplement: cddis2013184x2.pdf [file cddis2013184x2.pdf]

**Supplementary Table 1. Primers used for Q-PCR**

| <b>Name</b>      | <b>Sequence</b>                                         |
|------------------|---------------------------------------------------------|
| RT-loop-miR29a/c | 5'-CTCAACTGGTGTTCGTGGAGTCGGCAATTCA GTTGA GTAACCGAT -3'  |
| RT-loop-miR29b   | 5'-CTCAACTGGTGTTCGTGGAGTCGGCAATTCA GTTGA GAACA CTGA -3' |
| miR29a-Forward   | 5'-TCGGCA GGTA GCA CCATC-3'                             |
| miR29b-Forward   | 5'-TCGGCA GGTA GCA CCATTTGAAA -3'                       |
| miR29c-Forward   | 5'-TCGGCA GGTA GCA CCATT-3'                             |
| universe-Reverse | 5'-TGCA GGTCAACTGGTGTTCGT-3'                            |
| U6-Forward       | 5'-GTGCTCGCTTCGGCAGCACATAT-3'                           |
| U6- Reverse      | 5'-AAAATATGGAA CGCTTCACGAA -3'                          |
| Tubb5-Forward    | 5'-GA CTATGGACTCCGTTTCGCTC-3'                           |
| Tubb5- Reverse   | 5'-TATTCTTCCCGGATCTTGCTG-3'                             |
| Akt3-Forward     | 5'-GGATCA CAGATGCA GCTA CC-3'                           |
| Akt3- Reverse    | 5'-GTA GAAA GGCAACCTTCCACAC-3'                          |
